# Supplementary material
Source: PubMed Central journal article supplement (PMC5999551)
Supplement: NIHMS951433-supplement-Supp_FigS2.pdf [file NIHMS951433-supplement-Supp_FigS2.pdf]

**A**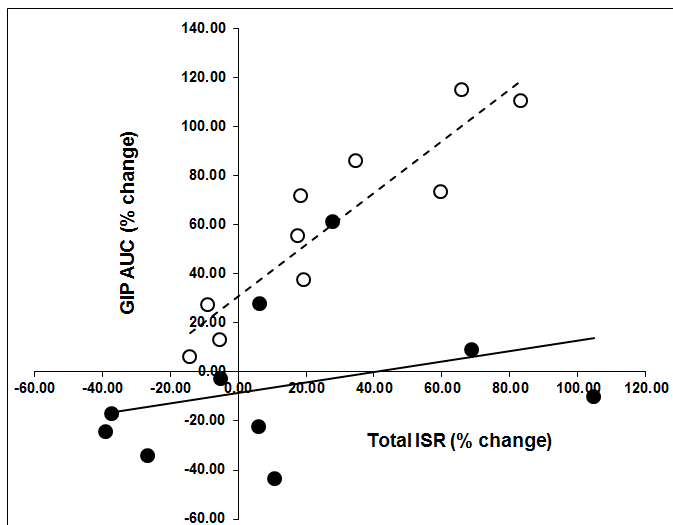

○ Diet only Period  $r = 0.927$   $P = 0.0002$   
 ● Diet and RYGB Period  $r = 0.455$   $P = 0.10$

**B**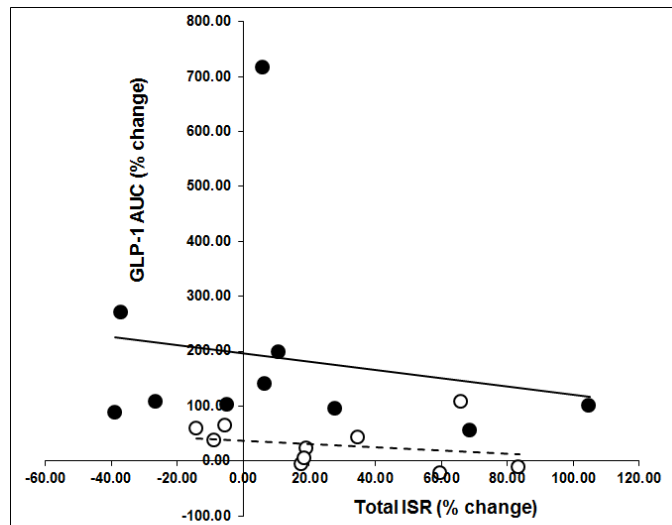

○ Diet only Period  $r = -0.321$   $P = 0.184$   
 ● Diet and RYGB Period  $r = -0.285$   $P = 0.214$

**C**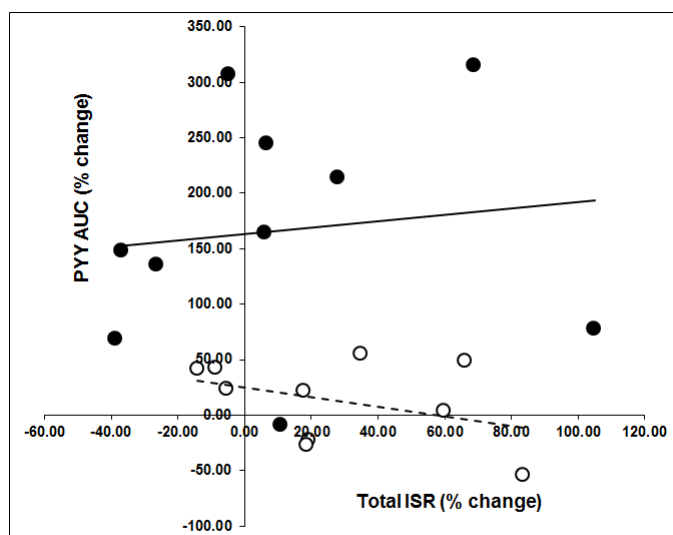

○ Diet only Period  $r = -0.249$   $P = 0.246$   
 ● Diet and RYGB Period  $r = 0.224$   $P = 0.268$
