# Supplementary material
Source: PubMed Central journal article supplement (PMC5999551)

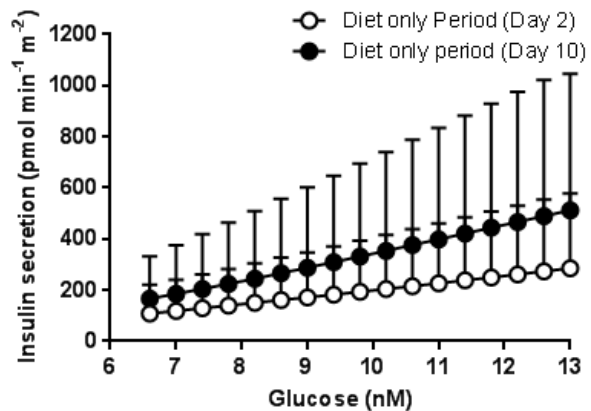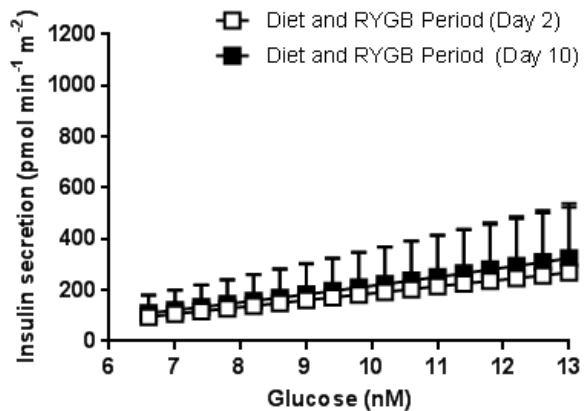

Supplement: NIHMS951433-supplement-Supp_FigS1.pdf [file NIHMS951433-supplement-Supp_FigS1.pdf]
